# Supplementary material for: ER3D: a structural and geophysical 3-D model of central Emilia-Romagna (northern Italy) for numerical simulation of earthquake ground motion
Source: Copernicus journal article supplement (doi:10.5194/se-10-931-2019), 2019-06-25
Supplement: Supplementary file 1 [file se-10-931-2019-supplement.zip]

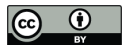

## *Supplement of*

# **ER3D: a structural and geophysical 3-D model of central Emilia-Romagna (northern Italy) for numerical simulation of earthquake ground motion**

**Peter Klin et al.**

*Correspondence to:* Peter Klin ([pklin@inogs.it](mailto:pklin@inogs.it))

- [se-10-931-2019-supplement-title-page.pdf](#)
- [Supplement.pdf](#)

The copyright of individual parts of the supplement might differ from the CC BY 4.0 License.
