# Supplementary figures and images for: ER3D: a structural and geophysical 3-D model of central Emilia-Romagna (northern Italy) for numerical simulation of earthquake ground motion
Source: Copernicus journal article supplement (doi:10.5194/se-10-931-2019), 2019-06-25

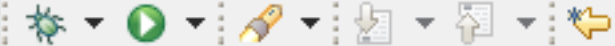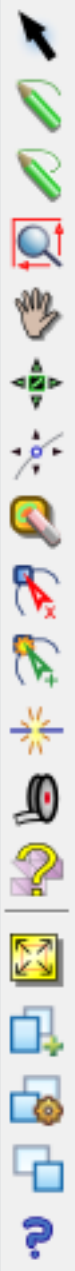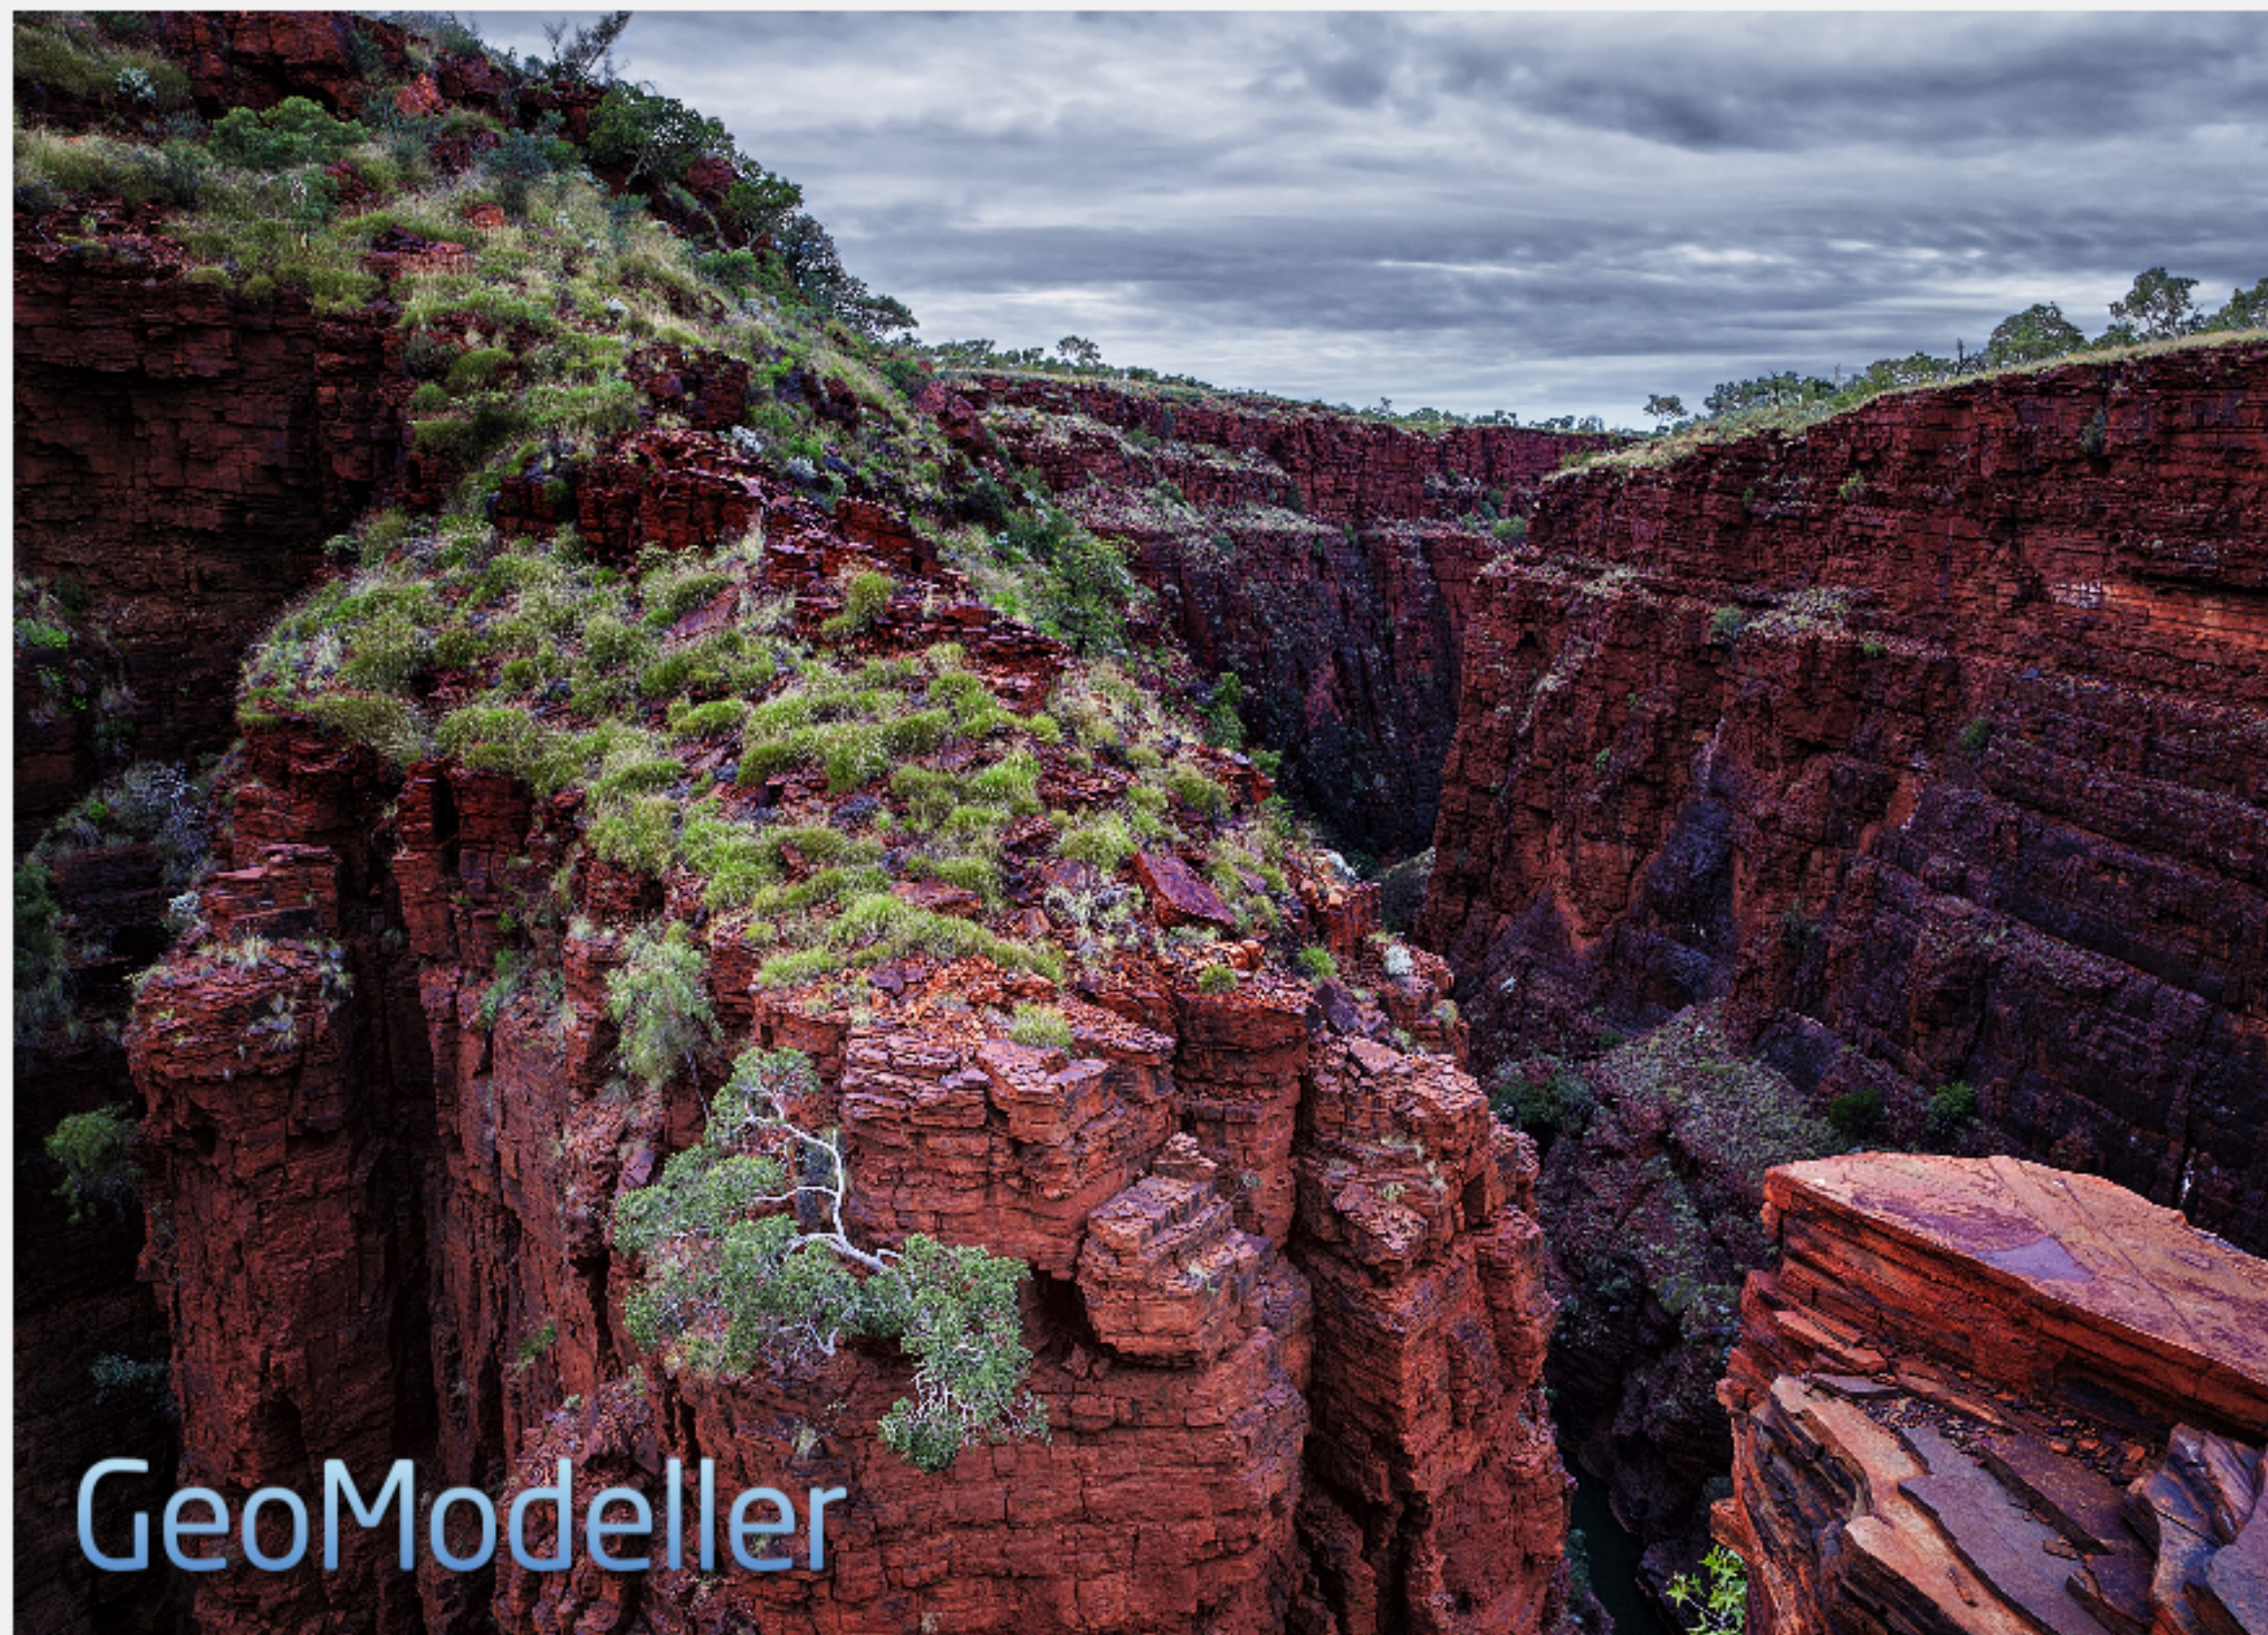

GeoModeller

Supplement: Supplementary file 2 [file se-10-931-2019-supplement.zip]
